# Supplementary material for: Alkaline stable anion exchange membranes based on poly(phenylene-co-arylene ether ketone) backbones
Source: Royal Society of Chemistry journal article supplement (doi:10.1039/c6py01080f), 2016-01-01
Supplement: c6py01080f1.pdf [file c6py01080f1.pdf]

## Supporting Information

### **Alkaline Stable Anion Exchange Membranes Based on Poly(phenylene-co-arylene ether ketone) Backbones**

Xiang Qiu <sup>a</sup>, Mitsuru Ueda <sup>a,b</sup>, Yi Fang <sup>a</sup>, Shouwen Chen <sup>a</sup>, Zhaoxia Hu <sup>a</sup>, Xuan Zhang <sup>a\*</sup>, Lianjun Wang <sup>a\*</sup>

- a) Jiangsu Key Laboratory of Chemical Pollution Control and Resources Reuse, School of Environmental and Biological Engineering, Nanjing University of Science & Technology, 200 Xiaolingwei, Nanjing 210094, Jiangsu Province, China;*
- b) Department of Polymer Science and Engineering, Graduate School of Science and Engineering, Yamagata University, 4-3-16 Jonan, Yonezawa, Yamagata 992-8510, Japan.*

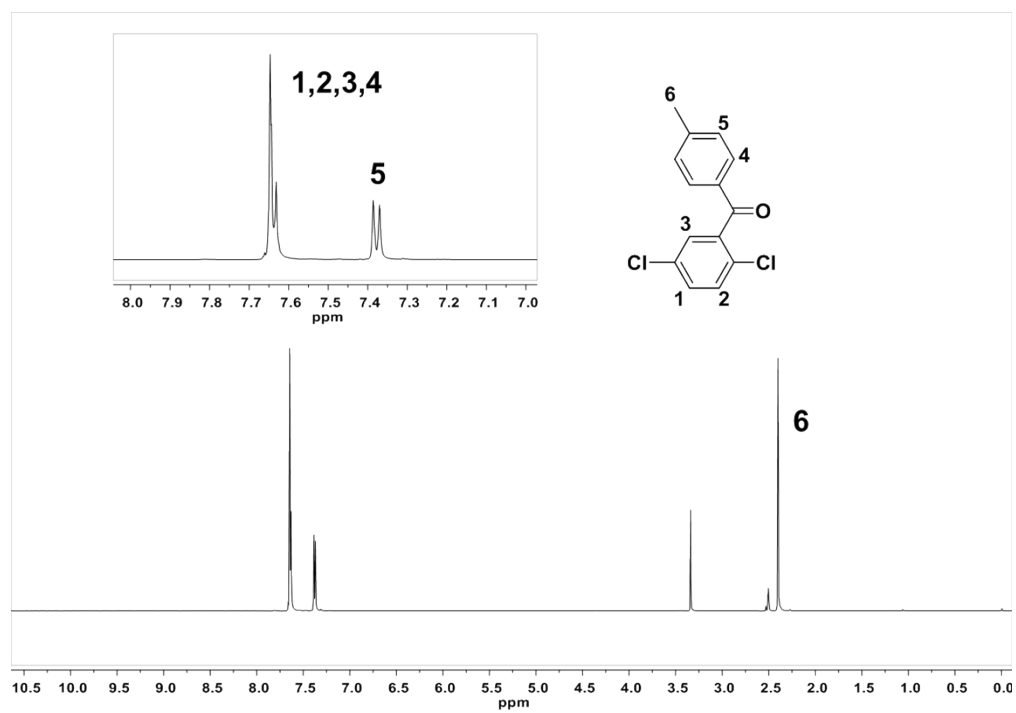

**Fig. S1.**  $^1\text{H}$  NMR spectrum of DCMB in  $\text{DMSO-d}_6$ .

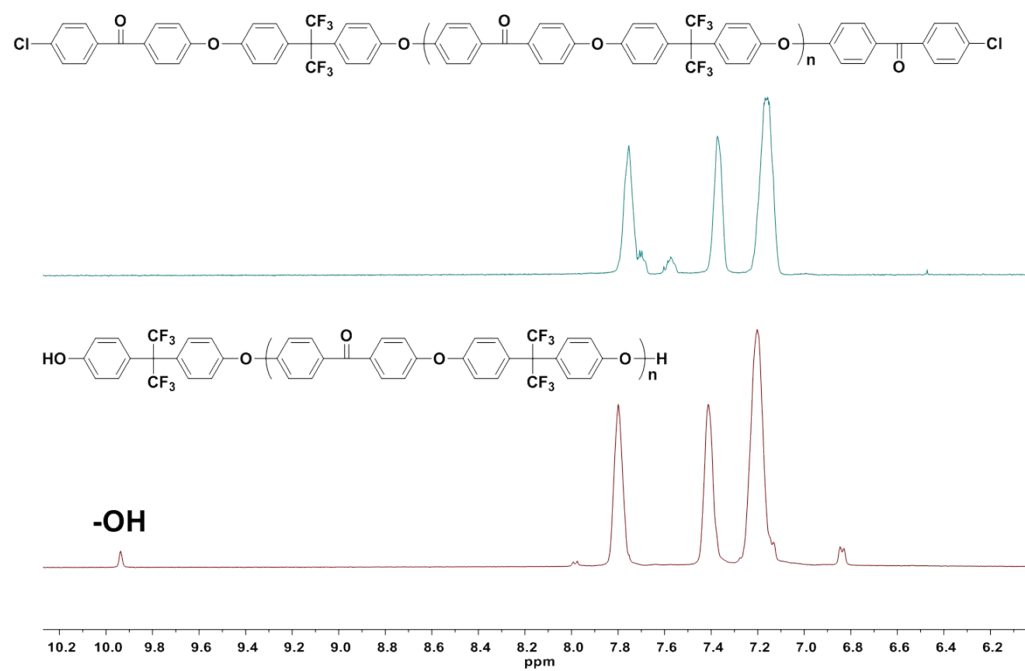

**Fig. S2.**  $^1\text{H}$  NMR spectra of OH-terminated oligomer (bottom) and Cl-terminated oligomer (top) in  $\text{DMSO-d}_6$ .

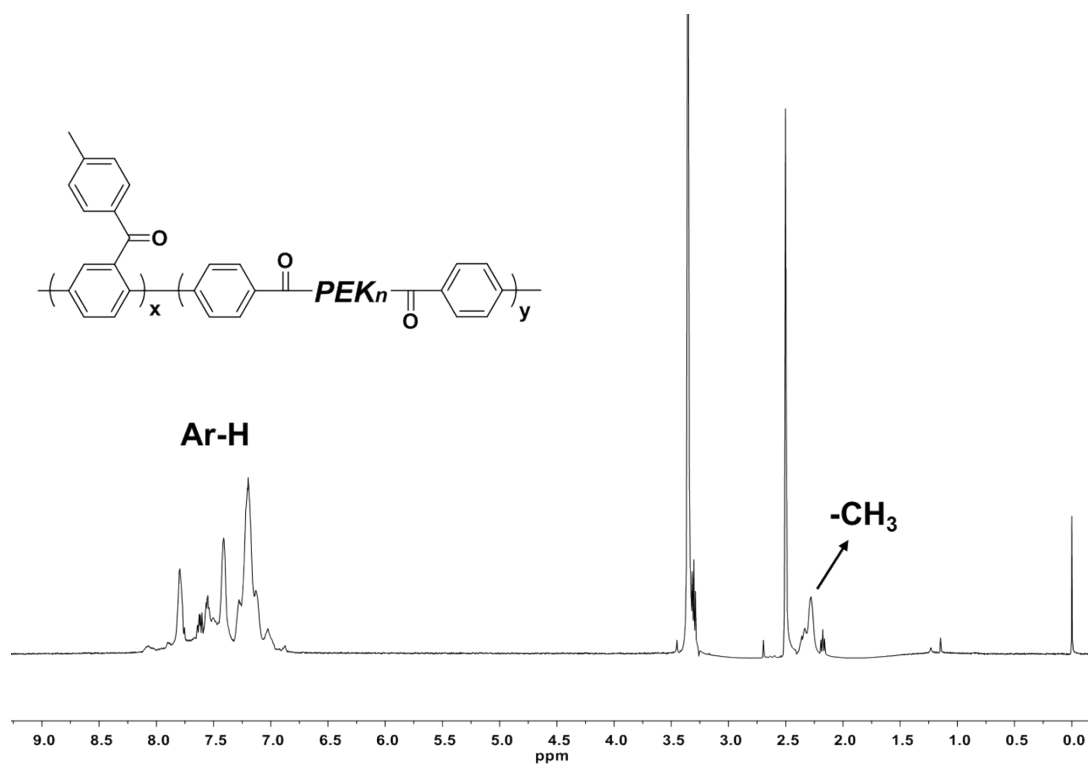

**Fig. S3.**  $^1\text{H}$  NMR spectrum of PPAEK in  $\text{DMSO-d}_6$ .

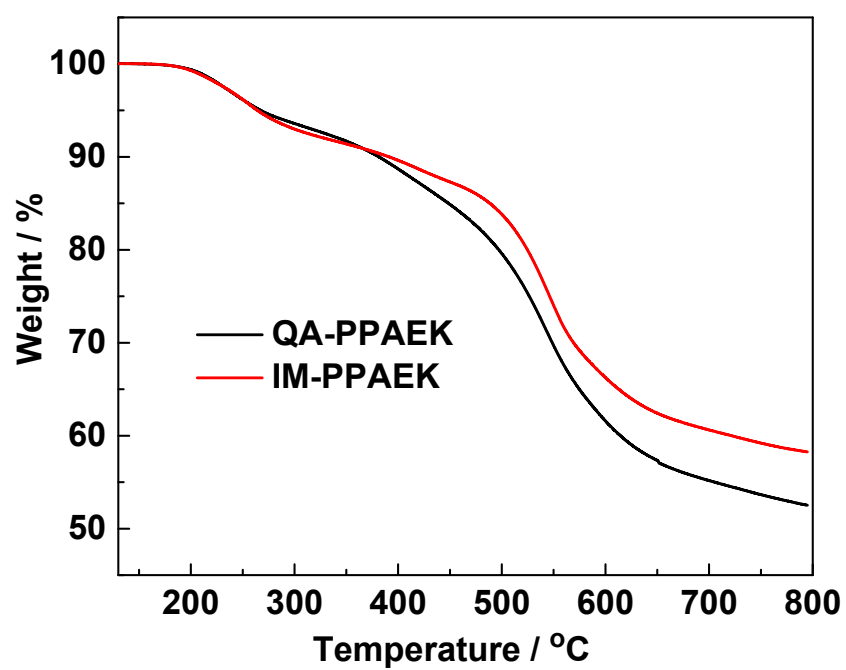

**Fig. S4.** TG analysis of QA- and IM-PPAEK.

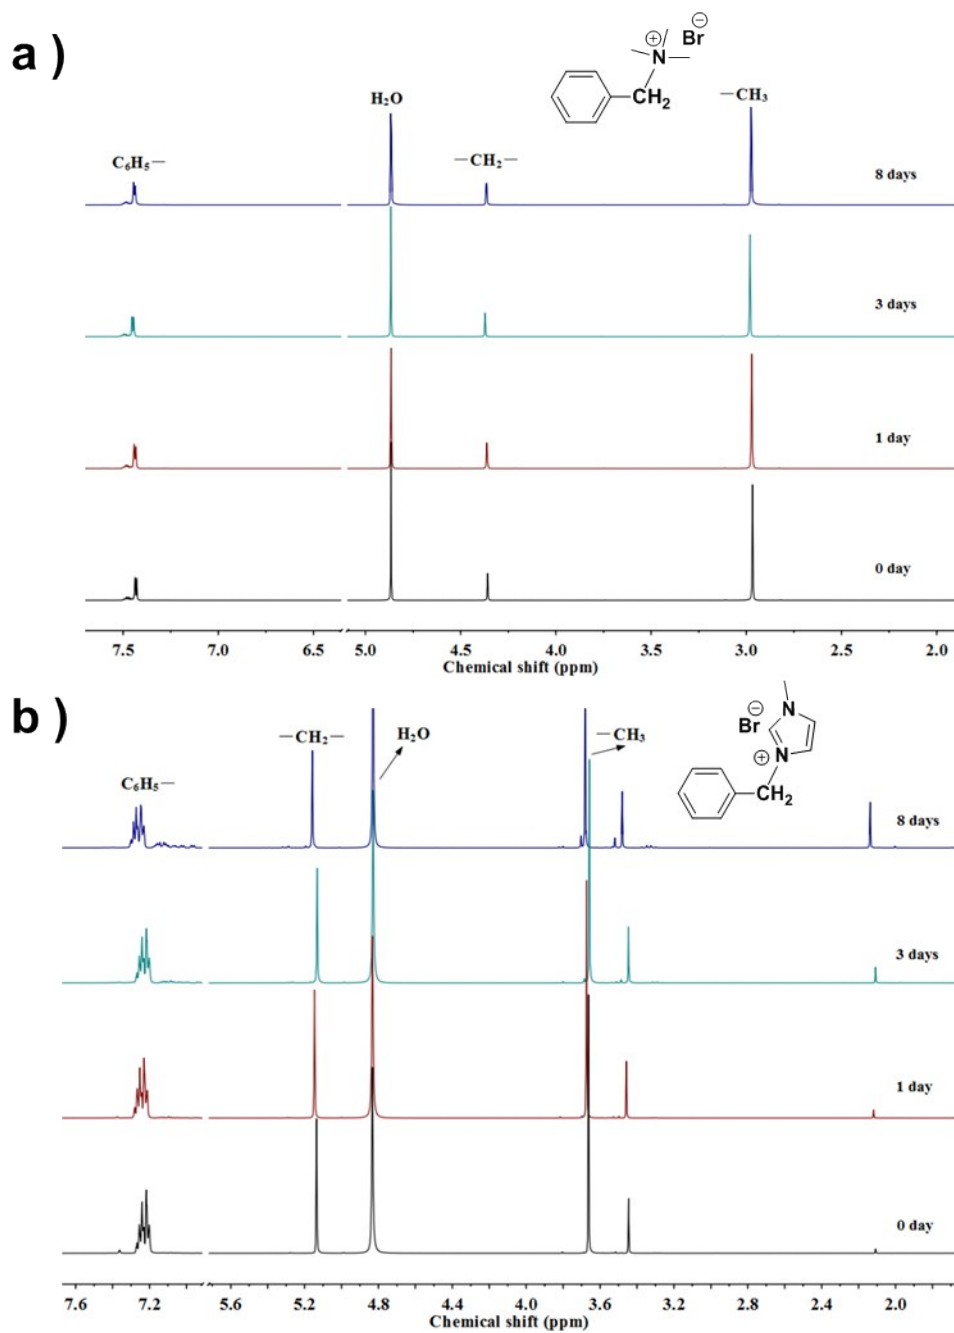

**Fig. S5.** The  $^1\text{H}$  NMR spectra of (a) QA, and (b) IM model compounds exposing to 1 M NaOD at 80  $^{\circ}\text{C}$ .

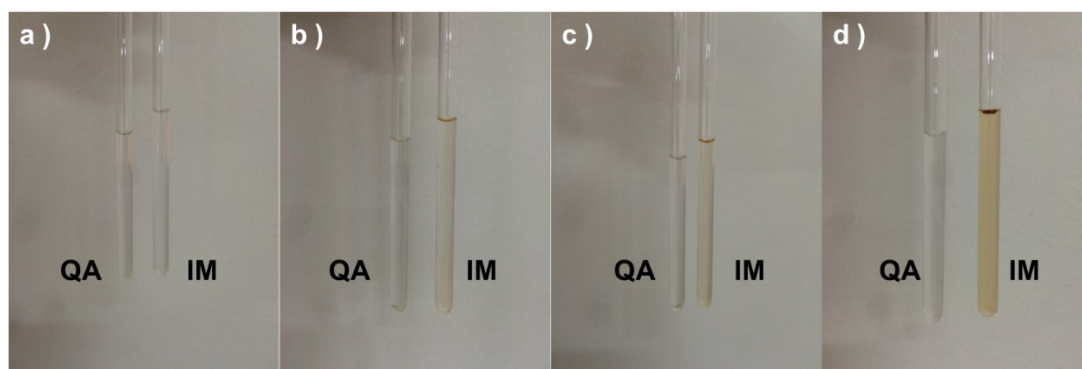

**Fig. S6.** The pictures of model compounds in NMR tubes of (a) 0 day, (b) 1 day, (c) 3 days and (d) 8 days in 1 M NaOD/D<sub>2</sub>O at 80 °C.
